# Supplementary material for: Potential of Fumagillin and Agaricus blazei Mushroom Extract to Reduce Nosema ceranae in Honey Bees
Source: PubMed Central journal article supplement (PMC8064457; doi:10.3390/insects12040282), 2021-03-25
Supplement: insects-12-00282-s001.pdf [file insects-12-00282-s001.pdf]

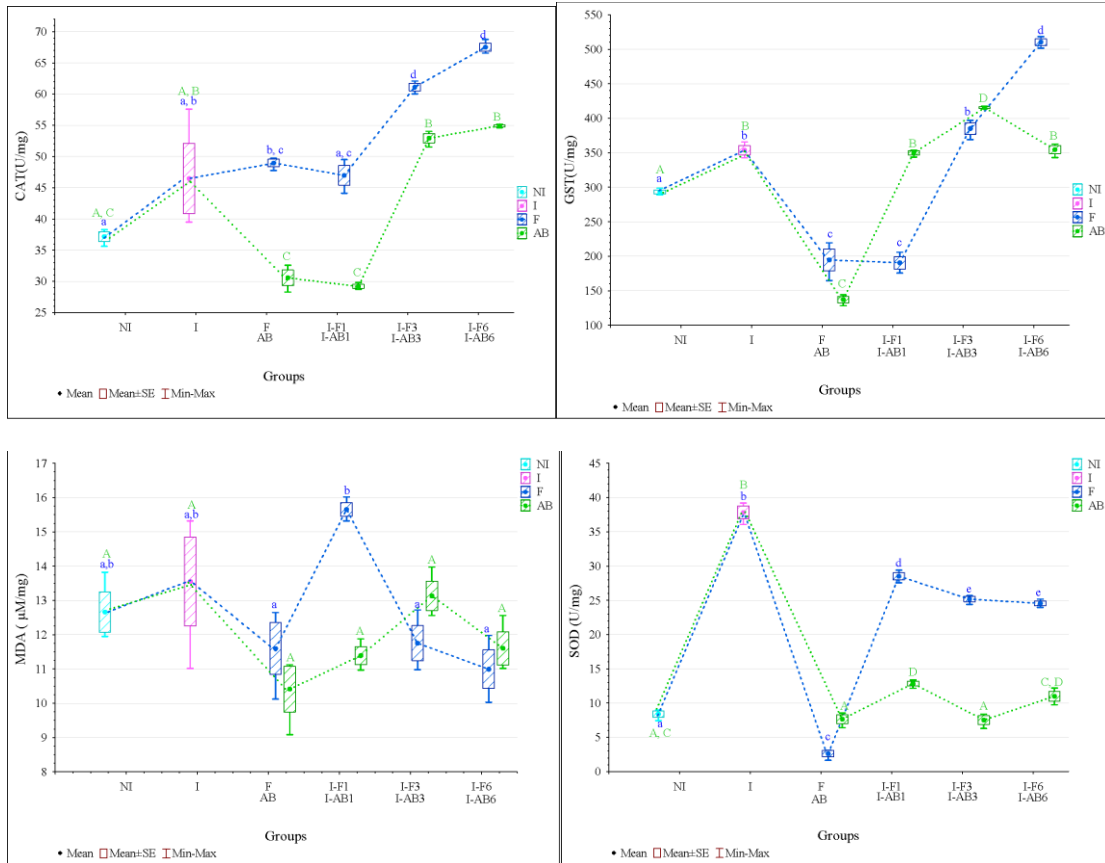

**Figure S1.** Levels of CAT, GST and SOD activities and MDA concentrations in experimental groups on day 15. Comparison was made between the non-infected control (NI), *N. ceranae*-infected control (I) and groups infected and treated with fumagillin from day 1 (I-F1), day 3 (I-F3) and day 6 (I-F6) or *A. blazei* extract from day 1 (I-AB1), day 3 (I-AB3) and day 6 (I-AB6). Group names are indicated in Table 1. Groups labelled with the same letter do not differ significantly. The same font style (lowercase or uppercase) refer to the same treatment.

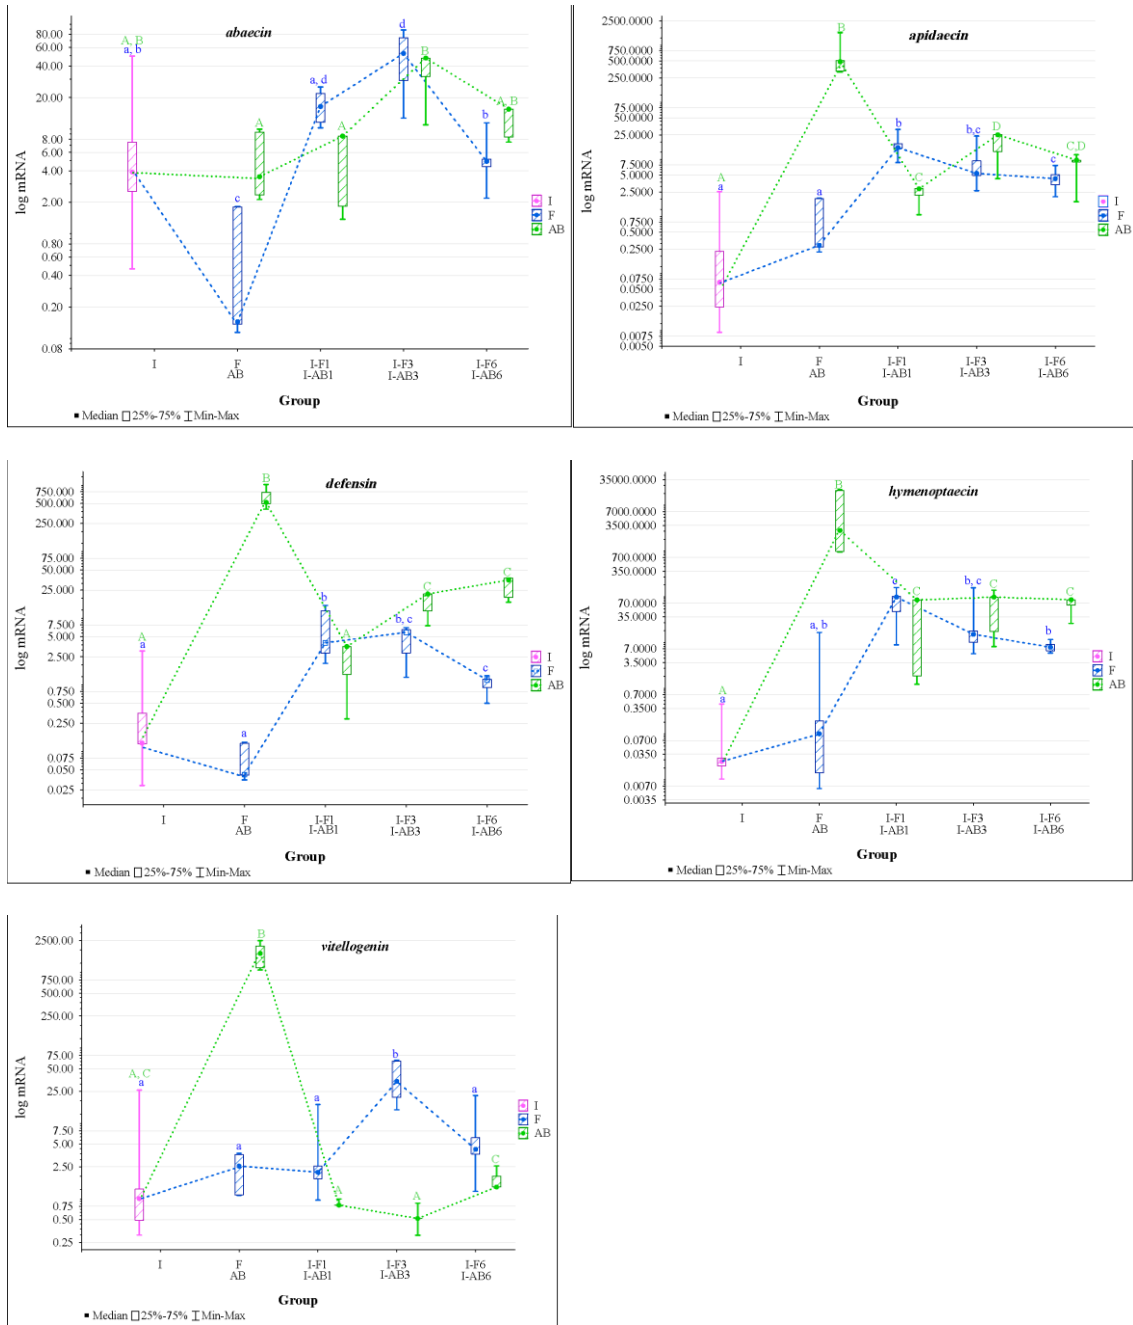

**Figure S2.** Expression levels of immune related genes (*abaecin*, *hymenoptaecin*, *defensin*, *apidaecin* and *vitellogenin*) in experimental groups on day 15. Comparison was made between the *N. ceranae*-infected control (I) and groups infected and treated with fumagillin from day 1 (I-F1), day 3 (I-F3) and day 6 (I-F6) or *A. blazei* extract from day 1 (I-AB1), day 3 (I-AB3) and day 6 (I-AB6). Group names are indicated in Table 1. Groups labelled with the same letter do not differ significantly. The same font style (lowercase or uppercase) refer to the same treatment.
